# Supplementary material for: Characterization of Live-Attenuated Powassan Virus Vaccine Candidates Identifies an Efficacious Prime-Boost Strategy for Mitigating Powassan Virus Disease in a Murine Model
Source: MDPI journal article supplement (doi:10.3390/vaccines11030612), 2023-03-08
Supplement: s1 [file s1]

## Gene Fragment Sequences

### GB2a

>Geneblock 2a (prME) complete sequence 1630 bp

```
GTCGACGCGGCCGCTAGCGATGACCCTGCTGATTGGTTCGCTGACCATTTCCGGGTGCG
GGACGGCGTTACCAGAACTCAGAAGGTTTCGTCCAACCAAACCGACTCTGACGGCAGTT
TACGAGAGAGATGATAGGGTCTGCTTCAGTAAGCCAGATGCTACACAATTAGGCTTGTAC
ATATTGTCGTTAGAACGCGGGCTACAATTAATACATAACCTTATGTATCATACACATACGATT
TAGGTGACACTATAGAGTAAATCCTGTGTGCTAATTGAGGTGCATTGGTCTGCAAATCGA
GTTGCTAGGCAATAAACACATTTGGATTAATTTAATCGTTCGTTGAGCGATTAGCAGAGA
ACTGACCAGAACATGTCTGGTCGTAAAGCTCAGGGAAAAACCCTGGGCGTCAATATGGTA
CGACGAGGAGTTCGCTCCTTGTCAAACAAAATAAAACAAAAACAAAACAAATTGGAAACA
GACCTGGACCTTCAAGAGGTGTTCAAGGATTTATCTTTTTCTTTTTGTTCAACATTTTGACT
GGAAAAAAGATCACAGCCACCTAAAGAGGTTGTGGAAAATGCTGGACCCAAGACAAGG
CTTGGCTGTTCTAAGGAAAGTCAAGAGAGTGGTGGCCAGTTTGATGAGAGGATTGTCCTC
AAGGAAACGCCGTTCCCATGATGTTCTGACTGTGCAATTCCTAATTTTGGGAATGCTGTTG
ATGACGGGTGGAACCTCCATCCATCGGGATAGAGAGGGATACATGGTCATGCGAGCTAG
CGGAAGAGATGCAGCAAGTCAAGTTAGAGTTCAAAACGGAACATGCGTTATTTTGGCAAC
GGACATGGGAGAATGGTGTGAAGATTCAATAACCTACTCCTGTGTTACGATTGACCAGGA
AGAAGAACCTGTTGATGTGGACTGTTTTTGCCGAGGTGTTGACAGAGTCAAGTTGGAGTA
CGGACGCTGTGGTAGACAGGCTGGATTCAGGGGGGAGAAGGTCTGTGGTCATCCCGACA
CATGCACAAAAGGACATGGTTGGGCGAGGACACGCATGGCTCAAGGGTGACAACATTCG
AGATCATGTTACCCGTGTGCGAGGGCTGGATGTGGAAAAACAAGCTCTTGACAGTTGCCGT
AGTGGCTTTGGCTTGGCTCATGCTGGATAGTTGGATGGCTAGGGTGACTGTGATCCTTCT
GGCGCTGAGCCTTGGGCCCGTATATGCCACGAGATGCACGCACCTTGAGAACAGGGACT
TTGTAACAGGAGTACAGGGAACCACTAGGGTGTCCCTGGTTCTGGAGCTTGGGGGATGT
GTGACCATCACTGCTGAGGGCAAGCCGTCCATTGACGTATGGCTGGAGGACATTTTCCAA
GAAAGTCCCGCTGAAACCAGAGAATACTGTCTACACGCCAAGCTTTCCAATACAAAAGTA
GAGGCTCGCTGCCCTACCACTGGGCCAGCTACGCTTCCAGAGGAGCACCAGGCCAACAT
GGTGTGTAAGAGAGACCAGAGCGACCGCGGATGGGGAAACCACTGTGGATTTTTCGGGA
AAGGAAGCATCGTGGCCTGTGCCAAGTTTGAATGTGAGGAAGCAAAAAGGCTGTAGGT
CATGTTTATGACTCA
```

### GB2b

>Geneblock 2b (SigprME) complete sequence 1630 bp

```
GTCGACGCGGCCGCTAGCGATGACCCTGCTGATTGGTTCGCTGACCATTTCCGGGTGCG
GGACGGCGTTACCAGAACTCAGAAGGTTTCGTCCAACCAAACCGACTCTGACGGCAGTT
TACGAGAGAGATGATAGGGTCTGCTTCAGTAAGCCAGATGCTACACAATTAGGCTTGTAC
ATATTGTCGTTAGAACGCGGGCTACAATTAATACATAACCTTATGTATCATACACATACGATT
TAGGTGACACTATAGAGTAAATCCTGTGTGCTAATTGAGGTGCATTGGTCTGCAAATCGA
GTTGCTAGGCAATAAACACATTTGGATTAATTTAATCGTTCGTTGAGCGATTAGCAGAGA
ACTGACCAGAACATGTCTGGTCGTAAAGCTCAGGGAAAAACCCTGGGCGTCAATATGGTA
CGACGAGGAGTTCGCTCCTTGTCAAACAAAATAAAACAAAAACAAAACAAATTGGAAACA
GACCTGGACCTTCAAGAGGTGTTCAAGGATTTATCTTTTTCTTTTTGTTCAACATTTTGACT
GGAAAAAAGATCACAGCCACCTAAAGAGGTTGTGGAAAATGCTGGACCCAAGACAAGG
CTTGGCTGTTCTAAGGAAAGTCAAGAGAGTGGTGGCCAGTTTGATGAGAGGATTGTCCTC
```

AAGGAAACGCCGTTTCAGGCGTTGACTGGACATGGACCTTCTTAGTTATGGCTTTGATGAC  
TATGGCCATGGCAACTTCCATCCATCGGGATAGAGAGGGGATACATGGTCATGCGAGCTA  
GCGGAAGAGATGCAGCAAGTCAAGTTAGAGTTCAAAACGGAACATGCGTTATTTTGGCAA  
CGGACATGGGAGAATGGTGTGAAGATTCAATAACCTACTCCTGTGTTACGATTGACCAGG  
AAGAAGAACCTGTTGATGTGGACTGTTTTTGGCGAGGTGTTGACAGAGTCAAGTTGGAGT  
ACGGACGCTGTGGTAGACAGGCTGGATTGAGGGGGAGAAGGTCTGTGGTCATCCCGACA  
CATGCACAAAAGGACATGGTTGGGCGAGGACACGCATGGCTCAAGGGTGACAACATTCTG  
AGATCATGTTACCCGTGTGCGAGGGCTGGATGTGGAAAAACAAGCTCTTGACAGTTGCCGT  
AGTGGCTTTGGCTTGGCTCATGCTGGATAGTTGGATGGCTAGGGTGACTGTGATCCTTCT  
GGCGCTGAGCCTTGGGCCCCGTATATGCCACGAGATGCACGCACCTTGAGAACAGGGACT  
TTGTAACAGGAGTACAGGGAACCACTAGGGTGTCCCTGGTTCTGGAGCTTGGGGGATGT  
GTGACCATCACTGCTGAGGGCAAGCCGTCCATTGACGTATGGCTGGAGGACATTTTCCAA  
GAAAGTCCCGCTGAAACCAGAGAATACTGTCTACACGCCAAGCTTTCCAATACAAAAGTA  
GAGGCTCGCTGCCCTACCACTGGGCCAGCTACGCTTCCAGAGGAGCACCAGGCCAACAT  
GGTGTGTAAGAGAGACCAGAGCGACCGCGGATGGGGAAACCACTGTGGATTTTTCGGGA  
AAGGAAGCATCGTGGCCTGTGCCAAGTTTGAATGTGAGGAAGCAAAAAAGGCTGTAGGT  
CATGTTTATGACTCA

GB3

>Geneblock 3 (DTV E into YF NS1) complete sequence 1656 bp

GCCTGTGCCAAGTTTGAATGTGAGGAAGCAAAAAAGGCTGTAGGTCATGTTTATGACTCA  
ACAAAAATCACATATGTTGTCAAGGTCGAGCCCCATACGGGGGATTACCAAGCTGCAAAT  
GAGACCAATGAGAACAGGAAAACGGCACAGTTCACAGTGGCATCCGAGAAGGTGATCTT  
GGACCTAGGAGACTATGGAGATGTGTGTCATTGACATGCAAGGTGGCAAGTGGAATTGATGT  
CGCCCAGACTGTGGTGATGTGCGTTGGCAGTAGCAAAGATCATCTGCCTTCGGCATGGC  
AGTTGCATCGTGACTIONGGTTCGAGGACCTAGCCCTGCCTTGGAACATAAAGATAATCAAG  
ATTGGAACAGTGTGGAGAACTTGTGGAGTTCGGGCCACCTCATGCTGTAAAAATGGACA  
TCTTTAATCTGGGGGATCAGACTGCTGTTCTGCTCAAATCACTGGCTGGAGTCCCACTGG  
CAAGTGTGGACAACCAGAAATATCACTTGAAAAGTGGTCATGTACCTGTGATGTGGGGC  
TTGAAAAGTTGAAGCTGAAAGGCACAACTTACTCCATGTGTGACAAAACAAAGTTCAAATG  
GAAAAGAGTTCTGTGGACAGTGGTCATGATACAGTGGTCATGGAGGTGTCTTACACAGG  
GAGTGACAAGCCCTGCCGAATTCCAGTGCGAGCAGTGGCGCACGGTGTCCCGACAATCA  
ATGTGGCCATGCTCATTACCCCCAACCCAACCAATTGAAACAAGTGGAGGAGGATTCATAG  
AGATGCAGTTGCCACCTGGGGACAACATTATCTATGTGGGGGATCTTAGTCAGCAGTGGT  
TCCAGAAAGGCAGCACCATAGGTAGAATGTTGAAAAGACTCGCAAGGGTTTGGAAAGAC  
TCTCAGTGGTTGGAGAACACGCATGGGACTTTGGTTGAGTGGGTGGAATCCTGTGTCGTCAG  
TTGGAAAGGCCATCCATACGGTGTGGGGGGGGGCATTCAACACCCTTTTTGGGGGAGTT  
GGGTTTATCCCTAAGATGCTGTTGGGAGTCGCCTTGGTGTGGTTGGGGCTTAACGCTAG  
GAATCCAACAATGTCTATGACTTTTCTTGTCGTGGGGGCCCTGACCTTGATGATGACAATG  
GGAGTCGGAGCAGATCAAGGATGCGCCATCAACTTTGGCAAGAGAGAGCTCAAGTGCGG  
AGATGGTATCTTCATATTTAGAGACTCTGATGACTGGCTGAACAAGTACTCATACTATCCA  
GAAGATCCTGTGAAGCTTGATCAATAGTGAAAGCCTCTTTTGAAGAAGGGAAGTGTGGC  
CTAAATTCAGTTGACTCCCTTGAGCATGAGATGTGGAGAAGCAGGGCAGATGAGATCAAT  
GCCATTTTTGAGGAAAACGAGGTGGACATTTCTGTTGTGTCGTGCAGGATCCAAAGAATGTT  
TACCAGAGAGGAACTCATCCATTTTCCAGAATTCGGGATGGTCTGCAGTATGGTTGGAAG  
ACTTGGGGTAAGAACCCTTGTGTTCTCCCCAGGGAGGAAGAATGGAAGCTTCATCATAGAT

GGAAAGTCCAGGAAAGAATGCCCGTTTTCAAACCGGGTCTGGAATTCTTTCCAGATAGAG  
GAGTTTGGGACGGGAGTGTTACCCACACGCGTGTACATG

Gene Fragments obtained in plasmids for Powassan virus recoding

>R1\_CDLR

CTAAATTGTAAGCGTTAATATTTTGTAAATTCGCGTTAAATTTTGTAAATCAGCTCATT  
TTTTAACCAATAGGCCGAAATCGGCCAAAATCCCTTATAAATCAAAAGAATAGACCGAGATA  
GGGTTGAGTGGCCGCTACAGGGCGCTCCCATTCGCCATTAGGCTGCGCAACTGTTGGG  
AAGGGCGTTTCGGTGCGGGCCTCTTCGCTATTACGCCAGCTGGCGAAAGGGGGGATGTGC  
TGCAAGGCGATTAAAGTTGGGTAAACGCCAGGGTTTTCCAGTCACGACGTTGTAAACGAC  
GGCCAGTGAGCGCGACGTAATACGACTCACTATAGGGCGAATTGGCGGAAGGCCGTCAA  
GGCCACGTGTCTTGTCGCTTAATTAACATCGATAATGATGGAGTGTTGGATTCACGCCT  
CTTCCTACCCGTCCTCTAGCAGGGCCAAGGTCAAAATACAACAGAATTCGGGGATATAG  
TGAGCAGACGAAGGGTCCGTGGGACCAGACTCCACTGAGAGTTGTCCGGGATCATTGTC  
CTGGAACAAGCGTGAAGATTGACAGTCAGTGCGACAAGAGGGGAGCTTCAGTCAGAAGC  
ACCACAGAGAGTGGAAAAATCATCCCAGAGTGGTGTTGCCGGGCCTGTGAACTGCCACC  
GGTGACTTTCCGCAGCGGGACTGACTGTTGGTATGCGATGGAAATCAGACCTGTTCACTC  
GCAGGGAGGCCTGGTCAGATCCATGGTAATGGCGGACAACGGGGCTATGCTTAGCGAG  
GGTGGAGTACCTGGACTGGTGGCTGTGTTTGTACTGATGGAATTTTGTGAGACGGCGA  
CCTGGATCTGTACCTCGATTTTGTGGGGTGGTATACTCATGCTGGGATTGCTTGTTACT  
GGAAGTGGTGGGAGTGGAGGAGATTGTACGCTACTTCATAGCTGTGGGGATCACCTTCCA  
CCTGGAGTTGGGGCCAGAGATCATGGCACTTGTGATGCTCCAAGCTGTTTTTAGCATGCG  
GACGTGCTATCTCACTGGTTTCCTCACAAAGAAGGTGATTACCACACGTGAAGTGGTGAC  
GGTCTATTTCTGCTGTTGGTCCTGGAGATGGGCATTCCAGAAATGAACCTGGGACATT  
ATGGGAGTGGGCTGATTCCTTGGCAATGGGACTGCTCATAATCAAGGCCAGTTCTATGGA  
AGACCGCAAGGGTTTAGGATTCTATTGGCTGGACTCATGACCCAGCGCCACCTGACTG  
CTGTTTCATCACGGCTTGATAGTCTTCCTCACTGTGGCATTGGCCGTTGTGGGGCGAAACA  
TTTACAATGGGCAAAAAGAGAGGAAAGGATTAAGCTTCACCATCCCTTTGGCCTCCCTAC  
TTGGCGGCCCTGGTTCGGGCTTACGCATGTTGGCGTTGTGGGAGTGTCTGAGGGGGCAC  
GGCAGACGAAGTCTAAGTGAGCCGCTCACTGTGGTTGGAGTCATGTTGGCTATGGCAAG  
TGGACTACTGCGGCACTCTTCCCAGGAGGCTTTGCTGGTCCTATCCGCAGGATCCTTCCT  
CATACTGATGTTGATATTGGGCACCCGAGACTTCAGTTGACGGCGGAGTGGGCGGGCT  
TGGCAGAATGGAATCCGGAATTGGTCAACGAAGGGGGAGAGGTTAGCCTAAAGGTGAGG  
CAGGATGCCATGGGGAACCTTGCACTTGACTGAAGTGGAACGCGAGGAACGCAGGCTGG  
CTCTCTGGCTAGTATTCGGCTTGCTGGCGTCGGCTTTCCACTGGTCTGGCATCTTGGTGA  
CTATGGGAGCATGGACCCTCTATGAGCTCCTCTCTTCAACCCGCAGAACTGACCTTGTTT  
TCTCTGGACAACTCTCAGACCATGGGGAAAGCAGGCCATTTGACATCAAAGACGGGGTAT  
ACCGAATATATGCTCCGGGACTCTTATGGGGTCACCGGCGCGCCGGAGCACAAAGACTGG  
CCTCATGGGCCTTCCGCTCACTGCCCCGCTTTCCAGTCGGGAAACCTGTCGTGCCAGCTG  
CATTAAACATGGTCATAGCTGTTTCCTTGCGTATTGGGCGCTCTCCGCTTCCTCGCTCACTG  
ACTCGCTGCGCTCGGTCGTTCCGGGTAAAGCCTGGGGTGCCTAATGAGCAAAAGGCCAGC  
AAAAGGCCAGGAACCGTAAAAAGGCCGCGTTGCTGGCGTTTTTCCATAGGCTCCGCCCC  
CCTGACGAGCATCACAAAATCGACGCTCAAGTCAGAGGTGGCGAAACCCGACAGGACT  
ATAAAGATAACAGGCGTTTCCCCCTGGAAGCTCCCTCGTGCGCTCTCCTGTTCCGACCCT  
GCCGCTTACCGGATACCTGTCCGCCTTTCTCCCTTCGGGAAGCGTGGCGCTTTCTCATAG

CTCACGCTGTAGGTATCTCAGTTCGGTGTAGGTCGTTGCTCCAAGCTGGGCTGTGTGCA  
CGAACCCCCCGTTTCAGCCCCGACCGCTGCGCCTTATCCGGTAACTATCGTCTTGAGTCCAA  
CCCGGTAAGACACGACTTATCGCCACTGGCAGCAGCCACTGGTAACAGGATTAGCAGAG  
CGAGGTATGTAGGCGGTGCTACAGAGTTCTTGAAGTGGTGGCCTAACTACGGCTACACTA  
GAAGAACAGTATTTGGTATCTGCGCTCTGCTGAAGCCAGTTACCTTCGGAAAAAGAGTTG  
GTAGCTCTTGATCCGGCAAACAAACCACCGCTGGTAGCGGTGGTTTTTTTGTGTTGCAAGC  
AGCAGATTACGCGCAGAAAAAAGGATCTCAAGAAGATCCTTTGATCTTTTCTACGGGGT  
CTGACGCTCAGTGGAACGAAAACTCACGTTAAGGGATTTTGGTCATGAGATTATCAAAAA  
GGATCTTCACCTAGATCCTTTTAAATTAATAATGAAGTTTTAAATCAATCTAAAGTATATATG  
AGTAAACTTGGTCTGACAGTTACCAATGCTTAATCAGTGAGGCACCTATCTCAGCGATCTG  
TCTATTTTCGTTTCATCCATAGTTGCCTGACTCCCCGTCGTGTAGATAACTACGATACGGGAG  
GGCTTACCATCTGGCCCCAGTGCTGCAATGATACCGCGAGAACCACGCTCACCGGCTCC  
AGATTTATCAGCAATAAACCAGCCAGCCGGAAGGGCCGAGCGCAGAAGTGGTCCTGCAA  
CTTTATCCGCCTCCATCCAGTCTATTAATTGTTGCCGGGAAGCTAGAGTAAGTAGTTCCGCC  
AGTTAATAGTTTTCGCAACGTTGTTGCCATTGCTACAGGCATCGTGGTGTACGCTCGTC  
GTTTGGTATGGCTTCATTACGCTCCGGTTCCTCAACGATCAAGGCGAGTTACATGATCCCC  
CATGTTGTGCAAAAAAGCGGTTAGCTCCTTCGGTCCTCCGATCGTTGTCAGAAGTAAGTT  
GGCCGCAGTGTTATCACTCATGGTTATGGCAGCACTGCATAATTCTCTTACTGTCATGCCA  
TCCGTAAGATGCTTTTCTGTGACTGGTGAGTACTCAACCAAGTCATTCTGAGAATAGTGTA  
TGCGGCGACCGAGTTGCTCTTGCCCGGCGTCAATACGGGATAATACCGCGCCACATAGC  
AGAACTTTAAAGTGCTCATCATTGGAACGTTCTTCGGGGCGAAAACTCTCAAGGATCT  
TACCGCTGTTGAGATCCAGTTCGATGTAACCCACTCGTGCACCCAACTGATCTTCAGCAT  
CTTTTACTTTACCAGCGTTTCTGGGTGAGCAAAAAACAGGAAGGCAAAATGCCGCAAAAA  
AGGGAATAAGGGCGACACGGAAATGTTGAATACTCATACTCTTCCTTTTTCAATATTATTG  
AAGCATTTATCAGGGTTATTGTCTCATGAGCGGATACATATTTGAATGTATTTAGAAAAATA  
AACAAATAGGGGTTCCGCGCACATTTCCCCGAAAAGTGCCAC

>R2\_CDLR

CTAAATTGTAAGCGTTAATATTTTGTAAATTCGCGTTAAATTTTTGTAAATCAGCTCATT  
TTTTAACCAATAGGCCGAAATCGGCAAAATCCCTTATAAATCAAAAGAATAGACCGAGATA  
GGGTTGAGTGGCCGCTACAGGGCGCTCCCATTCGCCATTACAGGCTGCGCAACTGTTGGG  
AAGGGCGTTTCGGTGCGGGCCTCTTCGCTATTACGCCAGCTGGCGAAAGGGGGATGTGC  
TGCAAGGCGATTAAGTTGGGTAACGCCAGGGTTTTCCAGTCACGACGTTGTAAACGAC  
GGCCAGTGAGCGCGACGTAATACGACTCACTATAGGGCGAATTGGCGGAAGGCCGTCAA  
GGCCACGTGTCTTGTCCGCGGTACCGGTCACCGGCAGATCGGAGTGGGATATGGCACC  
AAAGGTGTCTCCACACTATGTGGCATGTGACCAGAGGAGCTGCACTCAGTGTTGAAGG  
AGCCGTTTCCGGACCTTATTGGGCTGATGTGCGTGAGGATGTGGTGTGCTACGGAGGGG  
CATGGAGTCTGGAAGGCAAAATGGGGAGGGGAGGTTGTGCAGGTCCACGCCTTTCTCCA  
GATAGTGGCCACAAAGTTCATCAATGTCAACCCGGCAAACTGAATCTTGAAGGAGGGCGT  
GTAATGGGTGCAATCCCAATAGATCTACCCCGTGGCACATCGGGGAGCCCCATCATCAAT  
GCTCAGGGGATTGTCCTGGGTCTTTACGGGAACGGACTGAAATCAAACGATGTCTACATC  
AGCAGCATTGCGCAAGGAAGCGTTGAAAAGAGCCGACCAGATATGCCCTTGGCAGTTCA  
GGGGGGCAGATGGACATCCAAGGGTAGCATCACCGTTTTGGATATGCATCCTGGTTCAG  
GAAAGACACACAGAGTTCTCCCAGAGCTGATCCGAGAATGCATTGATAAAAGGCTGAGAA  
CTGTTGTGCTGGCTCCACACGTGTTGTCTTAAAGGAAATGGAAAGAGCACTTCAGGGCA  
AGCGTGTCAAATTCCATTACGCGGCAGTTGACAACACATCATCTTCATCTGGCGCCATCG

TGGATGTCATGTGCCACGCCACATATGTGAATCGCCGACTGTTGCCCCAAGGGAGACAG  
AATTGGGAAGTGGCCATCATGGATGAGGCACACTGGACTGACCCCCACTCCATAGCTGC  
ACGGGGTCATTTGTATTCCTTGGCCAAAGAAAATAGATGCGCTTTTGTTTTGATGACGGCC  
ACCCCGCCCGGAAAAAGTGAGGCTTTTCCAGAATCAAAAGGAGCAATAGTCAGTGAAGAA  
CGCCCCATACCTGATGGGGAGTGGAGAGATGGGTTTGATTGGGTGACAGAATTTGAGGG  
CCGAACCGCATGGTTCGTATCGTCAATAGCAAAAGGAGGGGCGATTGCTCGCACGTTGA  
GGCAGAAAGGGAAAAAGTGTGATCTGCTTGAACAGCAAGACTTTTGACAAGGACTATGGCA  
GAGTGCGTGAAGAAAAACCGGACTTTGTTGTCACTACGGACATCAGCGAGATGGGGGCT  
AACCTGGACGTTACACAGAGTAATAGATGGTAGGACTAACATCAAACCAGAAGAGATCGAT  
GGGAGAGTGGAGTTGGCTGGAACAAGGCGAGTGACAACAGCTTCAGCAGCCCAACGAA  
GGGGGCGGGTAGGCAGGCACGAAGGTCGCACGGACACCTATGTGTATTCAGGACAGTG  
TGACGATGATGACAGTTCACTGGTGCAGTGGAAAGAAGCGCAGATCTTGCGAGCTCGGA  
GCACAAGACTGGCCTCATGGGCCTTCCGCTCACTGCCCCGCTTTCCAGTCGGGAAACCTG  
TCGTGCCAGCTGCATTAACATGGTCATAGCTGTTTCCTTGCGTATTGGGCGCTCTCCGCT  
TCCTCGCTCACTGACTCGCTGCGCTCGGTCTGTTCCGGGTAAAGCCTGGGGTGCCTAATGA  
GCAAAAGGCCAGCAAAAGGCCAGGAACCGTAAAAAGGCCGCGTTGCTGGCGTTTTTCCA  
TAGGCTCCGCCCCCTGACGAGCATCACAAAAATCGACGCTCAAGTCAGAGGTGGCGAA  
ACCCGACAGGACTATAAAGATACCAGGCGTTTCCCCCTGGAAGCTCCCTCGTGCGCTCT  
CCTGTTCCGACCCTGCCGCTTACCGGATACCTGTCCGCCTTTCTCCCTTCGGGAAGCGTG  
GCGCTTTCTCATAGCTCACGCTGTAGGTATCTCAGTTCGGTGTAGGTCTGTTCCGCTCCAAG  
CTGGGCTGTGTGCACGAACCCCCCGTTACGCCCGACCGCTGCGCCTTATCCGGTAACTA  
TCGTCTTGAGTCCAACCCGGTAAGACACGACTTATCGCCACTGGCAGCAGCCACTGGTAA  
CAGGATTAGCAGAGCGAGGTATGTAGGCGGTGCTACAGAGTTCTTGAAGTGGTGGCCTA  
ACTACGGCTACACTAGAAGAACAGTATTTGGTATCTGCGCTCTGCTGAAGCCAGTTACCT  
TCGGAAAAAGAGTTGGTAGCTCTTGATCCGGCAAACAAACCACCGCTGGTAGCGGTGGT  
TTTTTTGTTTGCAAGCAGCAGATTACGCGCAGAAAAAAAGGATCTCAAGAAGATCCTTTGA  
TCTTTTCTACGGGGTCTGACGCTCAGTGGAACGAAAACCTCACGTTAAGGGATTTTGGTCA  
TGAGATTATCAAAAAGGATCTTCACCTAGATCCTTTTAAATTAAAAATGAAGTTTTAAATCA  
ATCTAAAGTATATATGAGTAACTTGGTCTGACAGTTACCAATGCTTAATCAGTGAGGCAC  
CTATCTCAGCGATCTGTCTATTTTCGTTTCATCCATAGTTGCCTGACTCCCCGTCGTGTAGAT  
AACTACGATACGGGAGGGCTTACCATCTGGCCCCAGTGCTGCAATGATACCGCGAGAAC  
CACGCTCACCGGCTCCAGATTTATCAGCAATAAACCAGCCAGCCGGAAGGGCCGAGCGC  
AGAAGTGGTCCTGCAACTTTATCCGCCTCCATCCAGTCTATTAATTGTTGCCGGGAAGCTA  
GAGTAAGTAGTTCGCCAGTTAATAGTTTTCGCAACGTTGTTGCCATTGCTACAGGCATCG  
TGGTGTACGCTCGTCGTTTGGTATGGCTTCATTACAGCTCCGGTTCCCAACGATCAAGGC  
GAGTTACATGATCCCCCATGTTGTGCAAAAAAGCGGTTAGCTCCTTCGGTCTCCGATCG  
TTGTCAGAAAGTAAGTTGGCCGCAGTGTTATCACTCATGGTTATGGCAGCACTGCATAATTC  
TCTTACTGTCATGCCATCCGTAAGATGCTTTTCTGTGACTGGTGAGTACTCAACCAAGTCA  
TTCTGAGAATAGTGTATGCGGCGACCGAGTTGCTCTTGCCCGGCGTCAATACGGGATAAT  
ACCGCGCCACATAGCAGAACTTTAAAAGTGCTCATCATTGGAAAACGTTCTTCGGGGCGA  
AACTCTCAAGGATCTTACCGCTGTTGAGATCCAGTTCGATGTAACCCACTCGTGCACCC  
AACTGATCTTCAGCATCTTTTACTTTACCCAGCGTTTCTGGGTGAGCAAAAACAGGAAGGC  
AAAATGCCGCAAAAAAGGGAATAAGGGCGACACGGAAATGTTGAATACTCATACTCTTCC  
TTTTTCAATATTATTGAAGCATTTATCAGGGTTATTGTCTCATGAGCGGATACATATTTGAA  
TGTATTTAGAAAAATAACAAATAGGGGTTCCGCGCACATTTCCCCGAAAAGTGCCAC

>R1\_CpG-H\_M1

ATCGATAATGACGGAGTGTTGGACTCTCGTCTTTTCCTGCCGGTTACTCTCGCGGGGCGG  
CGTTCAAAATACAACAGAATACCTGGATATAGCGAGCAAACGAAAGGGCCGTGGGATCAG  
ACCCCTCTGAGAGTCGTTTCGCGATCATTGCCCGGGAACAAGCGTGAAGATTGACAGTCA  
GTGTGACAAGAGAGGAGCGTCGGTGCGAAGCACGACCGAAAGCGGGAAAATCATCCCA  
GAGTGGTGCTGCCGAGCGTGTGAACTGCCACCGGTGACGTTCCGAAGCGGGACAGACT  
GTTGGTATGCAATGGAGATCCGACCCGTTCACTCTCAGGGTGGCCTCGTTTCGATCTATGG  
TAATGGCCGACAACGGCGCGATGCTGAGCGAGGGCGGGCGTCCCTGGACTCGTGGCCGT  
GTTTGTCTGATGGAGTTCTTGTTGAGAAGGCGTCCGGGTTCTGTACATCTATTTTATGG  
GGAGGTATACTCATGCTCGGTTTGCTTGTTACGGGGCTTGTTAGGCGTCGAGGAAATCGTA  
CGGTACTTCATCGCAGTTGGAATCACGTTCCACCTGGAGTTGGGACCAGAGATCATGGC  
GCTTGTGATGCTGCAGGCCGTCTTTAGCATGCGCACATGCTATCTCACTGGGTTTCTAAC  
TAAGAAGGTGATCACGACACGTGAGGTCGTGACCGTTTACTTCCTACTTTTGGTGCTTGA  
GATGGGGATAACCAGAAATGAACCTTGGACATTTATGGGAGTGGGCTGATTCGTTGGCGAT  
GGGACTACTCATAATCAAGGCAAGCTCCATGGAAGACCGAAAAGGCTTGGGATTCCTATT  
GGCTGGGCTAATGACACAGCGACACCTGACCGCCGTTACCATGGATTGATCGTATTCTT  
CACTGTTGCTTTGGCGGTGGTCGGACGAAACATCTACAACGGACAAAAAGAGAGGAAAG  
GATTAAGTTTCACGATACCTTTGGCGTCTCTACTGGGCGGGCCTGGATCTGGCTTACGCA  
TGTTAGCGTTGTGGGAATGCCTGAGGGGGCCATGGCAGACGAAGTCTGAGTGAACCTCTA  
ACTGTCGTCGGCGTCATGTTGGCAATGGCTAGTGGACTGCTGCGTCATTCTTCGCAGGA  
GGCGTTACTCGTCCTCTCTGCTGGTTCAATTTCTCATTCTGATGTTGATTTTGGGGACTCGC  
AGACTTCAGTTGACGGCCGAATGGGCAGGATTGGCTGAGTGAACCCTGAATTGGTGAA  
CGAGGGTGGAGAGGTTAGCCTAAAAGTGCGGCAGGATGCAATGGGGAACTTGCACTTGA  
CCGAAGTGGAAACGCGAAGAGCGCAGGCTCGCACTGTGGCTCGTCTTTGGTTTGCTCGCT  
TCCGCATTCCATTGGTCGGGAATATTGGTGACAATGGGAGCATGGACACTGTATGAGCTG  
CTCTCGTCAACGCGCAGAACGGACCTTGTATTCTCGGGTCAACTGTCTGACCATGGGGA  
GAGCAGGCCGTTTGACATAAAAGATGGCGTTTATCGCATATATGCGCCGGGACTCTTATG  
GGGTCACC

>R1\_CpG-H\_M2

ATCGATAATGATGGCGTTTTGGACTCACGTCTTTTCCTGCCGGTTACGCTTGCAGGTCCG  
CGTTCAAAATACAACCGAATACCCGGATATAGCGAGCAAACGAAAGGGCCTTGGGATCAG  
ACGCCGCTGAGAGTCGTGCGCGATCATTGCCCGGGAACAAGCGTGAAGATTGACAGTCA  
GTGTGACAAAAGAGGCGCGTCGGTTCGAAGCACGACGGAAAGCGGAAAAATAATCCCGG  
AGTGGTGCTGCCGCGCGTGTGAACTGCCGCCGGTCACATTCCGCAGCGGAACAGACTGT  
TGGTATGCAATGGAGATACGACCAGTTCACTCGCAGGGTGGCCTCGTTTCGATCAATGGTA  
ATGGCGGACAACGGCGCAATGCTGAGCGAGGGAGGCGTCCCAGGACTCGTCGCGGTTT  
TTGTGCTGATGGAGTTCTTGTTGAGAAGGCGTCCTGGTTCGGTCACGTCAATTTTATGGG  
GTGGTATACTCATGCTCGGTTTGCTTGTTACCGGGCTTGTCGGCGTTGAGGAGATTGTAC  
GGTACTTCATCGCCGTTGGGATCACGTTCCACCTTGAGTTGGGACCTGAGATCATGGCGC  
TTGTTATGCTTCAAGCAGTTTTTAGCATGCGCACATGCTATCTAACC GG GTTTCTGACCAA  
GAAGGTGATCACAACGCGTGAGGTCGTGACCGTTTACTTCCTACTTTTGGTGCTTGAAAT  
GGGGATAACCCGAAATGAACCTTGGACATTTATGGGAGTGGGCAGATTTCGTTGGCAATGG  
GACTACTTATAATCAAGGCAAGTTCAATGGAAGACCGAAAAGGGTTGGGATTCCTATTGG  
CCGGGCTCATGACTCAGCGACACCTGACGGCGGTTACCATGGATTGATCGTATTCTCTCA  
CCGTTGCGTTGGCCGTCGTTGGACGAAACATATACAACGGACAAAAAGAGCGGAAAGGA

TTAAGTTTCACGATCCCGTTGGCGTCACTACTTGGTGGGCCGGGATCCGGCTTACGAATG  
TTAGCGTTGTGGGAATGCCTTCGTGGCCATGGCAGACGAAGTCTGAGTGAACCGCTAAC  
GGTCGTTGGCGTGATGTTGGCAATGGCAAGTGGACTGCTGCGTCATTCGTCTCAGGAGG  
CCTTACTCGTCCTTTCCGCCGGTTCGTTTCTGATTCTGATGTTGATTTTGGGAACGCGGAG  
ACTTCAGTTGACGGCAGAATGGGCGGGATTGGCAGAGTGAACCCTGAATTGGTCAACG  
AGGGTGGTGAAGTTAGCCTAAAGGTTCCGGCAGGATGCAATGGGTAAATTTGCACTTGACG  
GAAGTCGAACGCGAAGAGCGCCGTCTCGCGCTTTGGCTCGTGTTTGGTTTGCTCGCGTC  
GGCGTTCCATTGGTCAGGAATATTGGTTACAATGGGTGCGTGGACACTTTACGAGCTCCT  
CTCGTCGACACGCCGAACGGACCTTGTATTCTCAGGGCAACTGTCCGACCACGGCGAGA  
GCCGGCCGTTTGACATAAAAGATGGCGTCTATCGAATATACGCGCCGGGACTGTTATGG  
GGTCACC

>R1\_UpA-H\_M1

ATCGATAATGATGGAGTCTTGGACTCTCGTCTCTTCCTGCCGGTAACTCTAGCCGGGCCC  
CGTTCTAAATACAACAGAATACCTGGATACAGTGAGCAAATAAGGGCCGTGGGATCAG  
ACCCCTCTGAGAGTGGTCCGGGACCATTGCCCGGGTACAAGCGTGAAGATAGACAGTCA  
GTGTGATAAGAGAGGAGCCTCAGTCAGGAGCACACAGAAAGCGGGAAAATTATCCCAG  
AGTGGTGCTGCCGAGCTTGTGAACTGCCACCGGTGACGTTCCGTAGCGGCACTGACTGT  
TGGTATGCCATGGAGATTAGGCCGGTACACTCGCAGGGTGGCCTGGTTAGATCTATGGTT  
ATGGCTGACAACGGCGCTATGCTCAGCGAGGGGGGAGTCCCTGGACTAGTGGCGGTGT  
TTGTCCTAATGGAGTTCTTGTTGAGAAGGCGTCCGGGTTCTGTACCTCTATATTGTGGG  
GAGGTATACTGATGCTAGGTTTGCTAGTTACAGGGCTAGTTGGAGTGGAGGAGATAGTCC  
GCTACTTCATCGCAGTTGGGATAACCTTCCACCTGGAGTTGGGACCAGAGATCATGGCCC  
TAGTGATGCTGCAGGCGGTCTTTAGCATGCGCACCTGCTATCTCACTGGGTTTCTCACTA  
AGAAGGTAATAACCACACGTGAGGTGGTCACTGTATACTTCCTACTTTTGGTCCTGGAGA  
TGGGGATACCAGAAATGAACCTAGGACATTTATGGGAGTGGGCTGATTCGTTGGCCATG  
GGACTIONCATAATCAAGGCAAGCTCTATGGAAGACCGAAAAGGCTTAGGATTCCCTGTTG  
GCTGGGCTCATGACCCAGCGACACCTGACGGCTGTACACCATGGATTAATAGTGTTCCCTC  
ACTGTGGCTTTGGCCGTGGTGGGACGTAACATATATAACGGACAAAAGGAGAGGAAAGG  
ATTAAGCTTCACCATCCCTTTGGCCTCGCTACTGGGGGGGCGGGCTCTGGCTTGCGCA  
TGTTAGCCTTGTTGGGAGTGCCTGAGGGGCCATGGCAGACGAAGTCTAAGTGAACCCCTT  
ACTGTGGTAGGGGTTATGTTAGCAATGGCTAGTGGACTGCTGCGTCATTCTTCCCAGGAG  
GCTTTGCTGGTCCTCTCTGCTGGTTCCTTCCTCATACTGATGTTGATATTAGGGACCCGCA  
GACTCCAGTTGACGGCGGAGTGGGCGGGATTGGCTGAGTGAACCCTGAATTGGTAAAC  
GAGGGGGGTGAGGTTAGCCTCAAGGTAAGGCAGGATGCTATGGGGAACCTTGCACTTGAC  
GGAAGTGAACGGGAAGAGCGCAGGCTGGCACTCTGGCTAGTATTTGGTTTGCTGGCTT  
CGGCCTTCCATTGGTCTGGAATATTGGTGACTATGGGAGCCTGGACCCTCTATGAGCTCC  
TGTCGTCTACACGTAGAACTGACCTTGTATTCTCTGGGCAACTGTCCGACCACGGGGAGA  
GCAGGCCTTTTGACATCAAAGATGGCGTCTATCGCATCTACGCCCCTGGACTATTGTGGG  
GTCACC

>R1\_UpA-H\_M2

ATCGATAATGATGGGGTGTTAGACTCCCGGCTATTCCTCCCGGTTACTCTGGCCGGGCCC  
CGCTCTAAATACAACAGGATCCCTGGCTATAGTGAGCAAATAAGGGGCCGTGGGATCA  
GACCCCTCTAAGAGTGGTACGGGATCATTGCCCCGGTACAAGCGTTAAGATAGACAGTCA  
GTGTGACAAGAGAGGGGCCTCAGTTAGAAGCACCACTGAGAGCGGGAAAATCATCCCAG

AGTGGTGCTGCCGGGCTTGTGAACTACCACCGTTACGTTCCGCAGCGGCACGGACTGT  
TGGTATGCCATGGAGATCAGGCCGGTACACTCGCAGGGGGGCCTAGTTAGGTCTATGGT  
TATGGCAGATAACGGCGCTATGCTTAGCGAGGGGGGGGTACCTGGGCTAGTAGCGGTAT  
TTGTACTAATGGAGTTCTTATTGAGGAGGCGTCCGGGTTCTGTTACATCAATATTGTGGGG  
AGGTATCCTTATGCTGGGGTTACTGGTTACAGGGCTGGTAGGAGTGGAGGAGATAGTAC  
GCTACTTCATAGCAGTAGGCATCACCTTCCACCTAGAGTTGGGACCAGAGATTATGGCCC  
TAGTTATGCTACAGGCGGTATTTAGCATGCGCACTTGCTATCTAACAGGGTTTCTAACCAA  
GAAGGTAATCACCACCCGTGAGGTAGTGAAGTGTATACTTCCCTACTGTTGGTACTGGAGAT  
GGGCATACCGGAAATGAACCTAGGACATTTGTGGGAGTGGGCTGATTCGTTAGCCATGG  
GACTGCTAATCATTAAGGCTAGCTCCATGGAGGACCGTAAGGGCTTGGGGTTCCTGTTGG  
CAGGGCTAATGACACAGCGACACCTCACTGCAGTACACCATGGCTTAATAGTATTCCTAA  
CTGTAGCTTTGGCCGTGGTAGGGCGCAACATATACAACGGGCAGAAGGAGAGGAAAGGA  
TTGAGCTTCACCATAACCCTTAGCCTCGCTGCTGGGGGGGGCCTGGCTCAGGCTTACGCAT  
GTTAGCCTTGTGGGAATGCCTTAGGGGCCATGGCAGACGTAGTCTTAGTGAACCCCTCAC  
TGTGGTGGGGGTTATGTTAGCCATGGCTAGTGGTCTGCTGCGTCATTCTTCCCAGGAGG  
CTTTACTGGTACTGTCTGCTGGTTCCCTTTCTTATCCTTATGTTGATCTTAGGTACGCGCAG  
ACTACAGTTAACGGCGGAATGGGCGGGATTAGCTGAGTGGAACCCCTGAGTTGGTTAACG  
AGGGGGGTGAGGTTAGCCTAAAGGTTAGGCAGGATGCCATGGGGAACCTTACACTTGACG  
GAGGTGGAGCGGGAGGAGCGCAGGCTAGCCCTATGGCTGGTATTTGTTTTGCTAGCCTC  
GGCCTTCCATTGGTCTGGGATCTTAGTCACTATGGGAGCTTGGACACTCTATGAGCTCCT  
CTCGTCCACACGCAGGACTGACCTGGTATTCTCAGGGCAACTATCCGACCACGGGGAGA  
GCAGGCCTTTTGATATCAAGGATGGCGTCTATCGCATCTACGCCCCTGGCCTCTTATGGG  
GTCACC

>R2\_CpG-H\_M1

GGTCACCGCCAGATTGGAGTCGGGTATGGAACAAAAGGAGTTCTACACACGATGTGGCA  
TGTGACAAGAGGAGCCGCTCTCAGTGTGGAAGGAGCGGTTTCAGGACCATATTGGGCCG  
ACGTGCGTGAGGACGTCGTTTGTTACGGAGGCGCGTGAGCCTGGAAGGAAAATGGGG  
AGGCGAAGTTGTTACGGTCCATGCTTTTCCGCCAGACAGTGGACACAAAGTCCATCAATG  
CCAACCAGGGAACTTAATCTTGAGGGAGGGCGAGTCATGGGGGCGATCCCGATCGATC  
TACCCCGTGGTACCTCAGGCAGCCCAATCATAAACGCACAAGGGATTGTGCTTGGTCTTT  
ACGGTAACGGTCTGAAATCAAATGATGTTTACATCAGCAGCATCGCGCAAGGAAGCGTTG  
AAAAGAGCCGTCCCGATATGCCATTGGCAGTTCAGGGGGGCAGATGGACATCGAAAGGA  
AGCATCACAGTCTTGGATATGCATCCTGGATCGGGAAAGACGCATAGAGTTCTTCCCGAG  
CTTATTCGTGAATGCATTGACAAAAGGTTAAGGACTGTCGTGCTTGCGCCAACGCGGGTC  
GTGTTGAAAGAAATGGAAAGGGCCCTGCAAGGAAAACGTGTCAAGTTTCATTAGCTGCC  
GTCGACAACACCTCTTCGTCGTCGGGCGCGATCGTTGATGTCATGTGTCATGCCACTTAC  
GTCAATCGCCGACTTTTGCCACAGGGGAGACAGAATTGGGAAGTCGCTATAATGGATGAA  
GCACACTGGACGGACCCTCATAGCATAGCAGCAAGGGGTCATTTGTACTCTTTGGCGAAA  
GAGAACAGATGTGCATTTGTTTTGATGACGGCCACTCCGCCGGGCAAAAGTGAAGCATT  
CCCGAATCGAAAGGAGCCATAGTTAGTGAAGAGCGACCCATTCCGGACGGGGAGTGGAG  
AGATGGCTTTGATTGGGTAACGGAATTCGAAGGCCGGACCGCTTGGTTCGTGTCATCAAT  
AGCCAAGGGAGGTGCGATTGCACGAACACTGAGGCAGAAAGGGAAAAGTGTGATATGTT  
TGAACAGCAAGACCTTTGACAAAGATTATGGCAGAGTCCGTGAGGAAAAACCTGACTTTG  
TTGTGACAACGGACATCTCAGAAATGGGGGCGAATCTCGACGTCCATAGAGTCATAGATG  
GCAGGACGAACATCAAACCTGAAGAAATCGATGGACGAGTCGAGTTGGCTGGCACAAGG



CGAGTGACTACCGCATCAGCCGCGCAACGAAGGGGGCGCGTTCGGAAGGCACGAAGGAC  
GCACTGACACTTATGTGTATTCTGGCCAATGTGACGATGATGACAGCTCTCTCGTGCACT  
GGAAGGAAGCGCAGATCTTGC

>R2\_CpG-H\_M2

GGTCACCGGCAGATTGGCGTTGGTTATGGAACAAAAGGCGTTCTACACACGATGTGGCA  
TGTGACGCGTGGAGCCGCGCTTAGTGTCGAAGGCGCGGTTTCGGGACCATATTGGGCC  
GACGTGCGTGAGGACGTCTGTTTGTACGGAGGTGCATGGAGCCTTGAAGGAAAATGGGG  
AGGTGAAGTTGTTTCAGGTCCATGCGTTTCCACCAGACAGTGGACACAAAGTCCATCAATG  
CCAACCGGGAAAACCTTAATCTTGAAGGCGGGCGCGTATGGGTGCGATACCAATCGACC  
TACCGCGTGGTACATCGGGCAGCCCAATAATCAACGCACAAGGGATTGTTCTTGGTCTTT  
ACGGTAATGGTCTGAAATCAAATGATGTTTACATAAGCAGCATTGCACAAGGAAGCGTTG  
AAAAGAGCCGTCCAGATATGCCATTGGCCGTTTCAGGGCGGCAGATGGACATCAAAAGGG  
AGCATAACAGTTTTGGATATGCATCCCGGATCAGGAAAGACACATCGAGTCCTTCCGGAG  
CTAATTCGTGAATGCATTGACAAACGGTTACGGACCGTTGTGCTCGCGCCAACACGCGTT  
GTGTTGAAAGAAATGGAAAGGGCACTTCAGGGAAAACGTGTCAAGTTTCATTTCAGCAGCC  
GTTGACAACACGTCGTCATCATCGGGCGCGATCGTTGATGTGCATGTGTCACGCGACGTAT  
GTCAATCGGCGACTCTTGCCACAGGGTCGACAGAATTGGGAGGTTGCGATAATGGATGA  
AGCACACTGGACCGACCCACATAGCATCGCAGCACGTGGTCATTTGTACTCATTGGCAAA  
AGAGAACCGATGCGCATTTGTTTTGATGACGGCGACGCCGCCCGGAAAGAGTGAGGCAT  
TCCCGGAATCAAAAGGCGCGATCGTGAGCGAAGAGCGACCGATTCCGGATGGCGAGTG  
GCGCGATGGATTTGATTGGGTAACGGAATTCGAGGGGCGGTACAGCATGGTTCGTTTCATC  
AATCGCAAAGGGAGGTGCAATTGCACGAACACTGCGACAGAAAGGGAAAAGTGTGATAT  
GTTTGAACAGCAAGACGTTTGACAAAGATTATGGACGCGTGCGTGAGGAAAAACCAGACT  
TTGTTGTCACAACCGACATATCGGAAATGGGCGCGAATCTCGACGTGCATCGCGTAATAG  
ATGGCAGGACGAACATCAAACCAGAAGAAATCGATGGACGAGTTGAGTTGGCAGGCACA  
CGGCGTGTGACGACCGCATCGGCAGCGCAACGACGCGGACGCGTCGGACGGCATGAAG  
GACGGACCGACACATATGTGTATTTCAGGGCAATGTGACGATGATGACAGCTCGCTTGTT  
AGTGGAAGGAAGCGCAGATCTTGC

>R2\_UpA-H\_M1

GGTCACCGCCAGATAGGGGTAGGGTATGGTACAAAAGGAGTCCTACACACTATGTGGCA  
TGTAACAAGAGGAGCGGCTCTCAGTGTGGAAGGAGCCGTATCAGGACCATATTGGGCCG  
ACGTACGTGAGGACGTAGTCTGTTACGGGGGTGCCTGGAGCCTGGAAGGTAAATGGGGA  
GGCGAAGTTGTTTCAGGTCCATGCTTTTCCCCCAGACAGTGGACACAAGGTCCATCAATGC  
CAACCAGGTAAACTGAATCTAGAGGGGGGGCGAGTCATGGGAGCCATCCCTATAGACCT  
ACCCCGTGGTACCTCAGGCAGCCCTATCATAAACGCCCAAGGGATAGTGCTAGGTCTATA  
CGGTAACGGTCTGAAATCTAATGATGTATACATCAGCAGCATTGCCCAAGGCAGCGTTGA  
AAAGAGCCGTCCAGATATGCCATTAGCCGTTTCAGGGGGGCAGATGGACCTCTAAAGGCA  
GCATCACTGTCTTGGATATGCATCCTGGGTCTGGGGAAGACACATAGAGTCCTACCCGAG  
CTAATTCGGGAATGCATTGACAAGAGGTTAAGGACGGTAGTGCTGGCCCCAACGCGGGT  
AGTGTTGAAAGAAATGGAGAGGGCCCTGCAGGGTAAACGTGTCAAGTTTCATTTCAGCTGC  
AGTAGACAACACCTCTTCATCATCAGGGGGCCATAGTGGATGTGCATGTGTCACGCCACTTA  
TGTCAATCGCCGACTCTTACCTCAGGGGAGACAGAATTGGGAGGTAGCTATTATGGATGA  
AGCCCACTGGACCGACCCCTCATAGCATAGCAGCACGTGGTCATTTATACTCTTTGGCCAA  
AGAGAACAGATGCGCGTTTGTGTTGATGACGGCCACTCCGCCAGGCAAGAGTGAGGCAT

TCCCTGAATCCAAAGGGGGCCATAGTAAGTGAAGAGCGACCCATACCCGATGGGGAGTGG  
AGAGATGGCTTTGACTGGGTGACGGAATTCGAGGGCCGGACGGCTTGGTTCGTGTCATC  
TATCGCCAAGGGAGGGGCTATAGCACGTACACTAAGGCAGAAAGGTAAAAGTGTGATAT  
GTTTGAACAGCAAGACCTTTGACAAAGATTATGGCAGGGTACGTGAGGAAAAACCTGACT  
TTGTAGTAACTACCGATATATCTGAAATGGGGGCCAATCTGGACGTCCACAGAGTCATAG  
ATGGCAGGACTAACATCAAACCTGAAGAAATCGATGGTAGAGTGGAGTTGGCTGGCACTA  
GGCGAGTGACTACAGCATCAGCGGCGCAACGCAGGGGGCGGGTAGGGAGGCATGAAG  
GACGCACTGACACTTATGTGTATTCTGGGCAATGTGACGATGATGACAGCTCTCTGGTAC  
AGTGGAAGGAGGCGCAGATCTTGC

>R2\_UpA-H\_M2

GGTCACCGCCAGATAGGGGTAGGGTATGGTACAAAAGGAGTCCTACACACCATGTGGCA  
TGTTACTAGAGGAGCGGCTCTTAGTGTAGAAGGAGCCGTATCAGGACCATATTGGGCCG  
ACGTGCGTGAGGACGTAGTATGTTACGGGGGTGCCTGGAGCCTGGAAGGGAAATGGGG  
AGGCGAAGTAGTACAGGTCCATGCTTTTCCCCCAGACAGTGGGCACAAGGTACATCAGT  
GCCAACCAGGGAAGCTAAATCTGGAGGGGGGGCGAGTAATGGGGGCCATCCCTATAGA  
CCTCCCCCGTGGCACCTCAGGCAGCCCTATAATCAACGCACAAGGTATAGTCCTGGGTC  
TATACGGTAACGGTCTAAAATCTAATGATGTATATATAAGCAGCATAGCCCAAGGCAGCGT  
AGAGAAGAGCCGTCCAGATATGCCATTAGCCGTACAGGGGGGGCAGATGGACATCTAAAG  
GCAGCATAACTGTATTGGATATGCATCCAGGATCGGGTAAGACCCATAGAGTCCTACCCG  
AGCTCATACGTGAATGCATAGACAAGAGGTTAAGGACTGTAGTACTGGCCCCTACGCGG  
GTGGTATTGAAAGAGATGGAGAGGGCCCTGCAGGGGAAACGGGTTAAGTTTCATTTCAGC  
TGCCGTAGACAACACCTCCTCATCCTCTGGGGCCATAGTAGATGTAATGTGTCACGCCAC  
TTATGTGAATCGCCGACTCTTACCACAGGGGAGACAGAATTGGGAGGTAGCTATAATGGA  
TGAAGCCCACTGGACCGACCCTCATAGCATAGCCGCACGTGGTCATTTGTAATCTTTGGC  
CAAGGAGAACAGATGCGCGTTTGTCTTGATGACGGCCACGCCGCCAGGCAAGAGTGAGG  
CATTCCCTGAGTCCAAAGGAGCCATAGTTAGTGAGGAGCGACCCATACCCGATGGGGAG  
TGGAGAGATGGCTTTGATTGGGTAACGGAGTTCGAGGGCCGTACGGCTTGGTTCGTCTC  
CTCTATAGCCAAGGGAGGTGCCATAGCACGTACCCTTAGGCAGAAAGGTAAAAGTGTTAT  
ATGTTTAAACAGCAAGACCTTTGACAAAGATTATGGCAGAGTACGTGAGGAGAAACCTGA  
CTTTGTGGTTACTACCGACATCTCAGAAATGGGGGCCAATCTAGACGTCCATAGGGTAAT  
AGATGGCAGGACTAACATCAAACCTGAAGAGATAGATGGGAGGGTAGAGTTGGCTGGCA  
CTAGGCGAGTTACTACTGCCTCAGCGGCGCAACGCAGGGGGCGGGTAGGTAGGCATGA  
AGGACGCACTGACACTTATGTATATTCTGGGCAATGTGACGATGATGACAGCTCTCTAGT  
GCAGTGGAAGGAAGCGCAGATCTTGC
